# Supplementary material for: Examining Constructs of Parental Reflective Motivation towards Reducing Unhealthy Food Provision to Young Children
Source: Nutrients. 2019 Jul 1;11(7):1507. doi: 10.3390/nu11071507 (PMC6682954; doi:10.3390/nu11071507)
Supplement: Supplementary file 1 [file nutrients-11-01507-s001.pdf]

# Examining constructs of parental reflective motivation towards reducing unhealthy food provision to young children

Brittany J Johnson <sup>1,2\*</sup>, Gilly A Hendrie <sup>3</sup>, Dorota Zarnowiecki <sup>1,4</sup>, Elisabeth K Huynh <sup>5</sup>, Rebecca K Golley <sup>1,4</sup>

<sup>1</sup> Nutrition & Dietetics, College of Nursing & Health Sciences, Flinders University, Bedford Park 5042, South Australia, Australia;

<sup>2</sup> School of Pharmacy & Medical Sciences, University of South Australia, Adelaide 5000, South Australia, Australia

<sup>3</sup> Health & Biosecurity Flagship, Commonwealth Scientific Industrial Research Organisation, Adelaide 5000, South Australia, Australia

<sup>4</sup> Early Prevention of Obesity in Childhood Centre for Research Excellence, Sydney 2006, New South Wales, Australia

<sup>5</sup> College of Health & Medicine, The Australian National University, Acton 2600, Australian Capital Territory, Australia

\* Correspondence: [brittany.johnson@flinders.edu.au](mailto:brittany.johnson@flinders.edu.au)

## Supplementary Materials

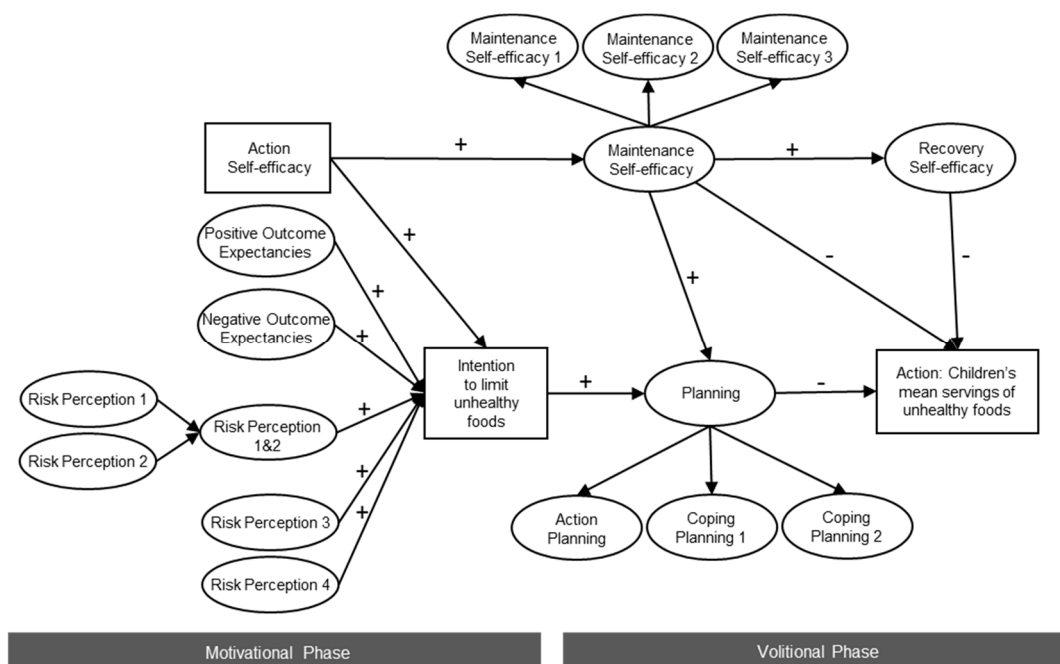

**Figure S1.** Theorized Health Action Process Approach model to examine using structural equation modelling. Adapted from Schwarzer [9]. Rectangles represent measured constructs; ellipses represent latent constructs; + represents hypothesized positive relationship and – represents a hypothesized negative relationship between variables.

## Examining constructs of parental reflective motivation towards reducing unhealthy food provision to young children

Brittany J Johnson <sup>1,2\*</sup>, Gilly A Hendrie <sup>3</sup>, Dorota Zarnowiecki <sup>1,4</sup>, Elisabeth K Huynh <sup>5</sup>, Rebecca K Golley <sup>1,4</sup>,

<sup>1</sup> Nutrition & Dietetics, College of Nursing & Health Sciences, Flinders University, Bedford Park 5042, South Australia, Australia;

<sup>2</sup> School of Pharmacy & Medical Sciences, University of South Australia, Adelaide 5000, South Australia, Australia

<sup>3</sup> Health & Biosecurity Flagship, Commonwealth Scientific Industrial Research Organisation, Adelaide 5000, South Australia, Australia

<sup>4</sup> Early Prevention of Obesity in Childhood Centre for Research Excellence, Sydney 2006, New South Wales, Australia

<sup>5</sup> College of Health & Medicine, The Australian National University, Acton 2600, Australian Capital Territory, Australia

\* Correspondence: [brittany.johnson@flinders.edu.au](mailto:brittany.johnson@flinders.edu.au)

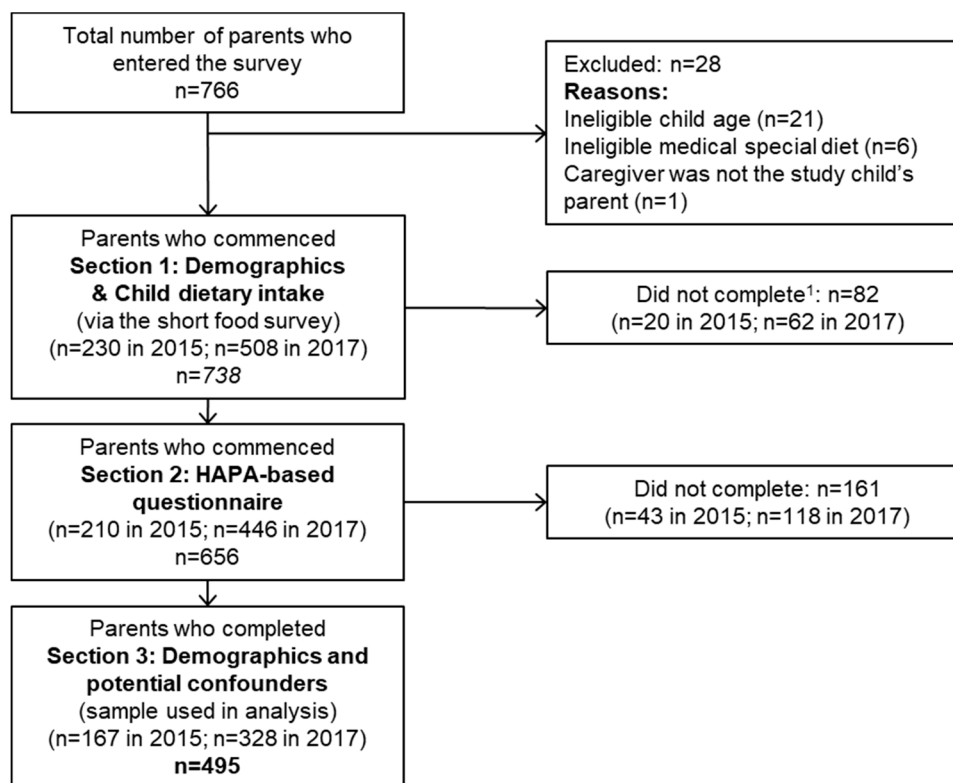

**Figure S2.** Flow of parent completion of the online survey

<sup>1</sup>Non-completers were excluded from all analyses.

# Examining constructs of parental reflective motivation towards reducing unhealthy food provision to young children

Brittany J Johnson <sup>1,2\*</sup>, Gilly A Hendrie <sup>3</sup>, Dorota Zarnowiecki <sup>1,4</sup>, Elisabeth K Huynh <sup>5</sup>, Rebecca K Golley <sup>1,4</sup>,

<sup>1</sup> Nutrition & Dietetics, College of Nursing & Health Sciences, Flinders University, Bedford Park 5042, South Australia, Australia;

<sup>2</sup> School of Pharmacy & Medical Sciences, University of South Australia, Adelaide 5000, South Australia, Australia

<sup>3</sup> Health & Biosecurity Flagship, Commonwealth Scientific Industrial Research Organisation, Adelaide 5000, South Australia, Australia

<sup>4</sup> Early Prevention of Obesity in Childhood Centre for Research Excellence, Sydney 2006, New South Wales, Australia

<sup>5</sup> College of Health & Medicine, The Australian National University, Acton 2600, Australian Capital Territory, Australia

\* Correspondence: [brittany.johnson@flinders.edu.au](mailto:brittany.johnson@flinders.edu.au)

**Table S1:** Parental Food Attitude Questionnaire<sup>1</sup> motivational phase

| Motivation construct                    | Final question                                                                                                                                                                                                                                                                                                                                                                                                                                                                                                                              | Scoring criteria                                                                                                                                | Scoring range |
|-----------------------------------------|---------------------------------------------------------------------------------------------------------------------------------------------------------------------------------------------------------------------------------------------------------------------------------------------------------------------------------------------------------------------------------------------------------------------------------------------------------------------------------------------------------------------------------------------|-------------------------------------------------------------------------------------------------------------------------------------------------|---------------|
| Risk perception 1 – absolute risk       | 1. Considering the extras you provide to your child from within the home, choose if you think this is lower to higher than the following statements.<br><i>‘Extras from within the home’ refers to all home made or brought extras provided within the home, as well as those packed from the home e.g. lunchboxes and picnics.</i><br>a) Compared with how active my child is the amount of extras I provide to my child is...<br>b) Compared with how healthy my child’s overall diet is the amount of extras I provide to my child is... | 5 = Lower<br>4 = Slightly lower<br>3 = Same<br>2 = Slightly higher<br>1 = Higher                                                                | 2 - 10        |
| Risk perception 2 – absolute risk       | c) Compared with that of other children the same age as my child the amount of extras I provide to my child is...<br>d) Compared with that of other children the same size (weight and height) as my child the amount of extras I provide to my child is...                                                                                                                                                                                                                                                                                 |                                                                                                                                                 | 2 - 10        |
| Risk perception 3 - severity assessment | 2. For 4-7 year old children (i.e. similar age and size to your child), in general, how serious a concern do you think the following are:<br>a) being overweight<br>b) tooth decay<br>c) behavioural issues<br>d) too much energy (calories), saturated fat, added sugar and salt                                                                                                                                                                                                                                                           | 1 = Not serious at all (can be ignored)<br>2 = Somewhat serious<br>3 = Moderately serious<br>4 = Serious<br>5 = Very serious (life threatening) | 4 - 20        |
| Risk perception 4 – risk for child      | 3. How much do you agree or disagree with the following statements. If I limit the extras I provide to my child, I think that I can reduce their chances of...<br>a) becoming overweight in the next 2-3 years<br>b) developing tooth decay                                                                                                                                                                                                                                                                                                 | 5 = Strongly agree<br>4 = Agree<br>3 = Neither agree nor disagree<br>2 = Disagree<br>1 = Strongly disagree                                      | 2 - 10        |

<sup>1</sup> The term ‘extras’ is used to describe unhealthy foods.

# Examining constructs of parental reflective motivation towards reducing unhealthy food provision to young children

Brittany J Johnson <sup>1,2\*</sup>, Gilly A Hendrie <sup>3</sup>, Dorota Zarnowiecki <sup>1,4</sup>, Elisabeth K Huynh <sup>5</sup>, Rebecca K Golley <sup>1,4</sup>,

<sup>1</sup> Nutrition & Dietetics, College of Nursing & Health Sciences, Flinders University, Bedford Park 5042, South Australia, Australia;

<sup>2</sup> School of Pharmacy & Medical Sciences, University of South Australia, Adelaide 5000, South Australia, Australia

<sup>3</sup> Health & Biosecurity Flagship, Commonwealth Scientific Industrial Research Organisation, Adelaide 5000, South Australia, Australia

<sup>4</sup> Early Prevention of Obesity in Childhood Centre for Research Excellence, Sydney 2006, New South Wales, Australia

<sup>5</sup> College of Health & Medicine, The Australian National University, Acton 2600, Australian Capital Territory, Australia

\* Correspondence: [brittany.johnson@flinders.edu.au](mailto:brittany.johnson@flinders.edu.au)

**Table S1:** Parental Food Attitude Questionnaire motivational phase (continued)

| Motivation construct          | Final question                                                                                                                                                                                                                                                                                                                                    | Scoring criteria                                                                                          | Scoring range |
|-------------------------------|---------------------------------------------------------------------------------------------------------------------------------------------------------------------------------------------------------------------------------------------------------------------------------------------------------------------------------------------------|-----------------------------------------------------------------------------------------------------------|---------------|
| Positive outcome expectancies | 4. How true are the following statements for you? If I limit my provision of extras from within the home...<br>a) ...my child will be healthy (i.e. weight, teeth)<br>c) ...my child will continue healthy eating habits into adulthood<br>e) ...my child will eat more fruit and vegetables<br>g) ...I'll be seen to be environmentally-friendly | 1 = Not at all true<br>2 = Somewhat true<br>3 = Mostly true<br>4 = Exactly true                           | 4 - 16        |
| Negative outcome expectancies | b) ...my child will throw a tantrum or pester me for extras<br>d) ...my child will miss out on having treats<br>f) ...it will affect what we do in family time (i.e. movie nights, baking, celebrations etc)<br>h) ...my child will overeat extras when they are available<br>i) ...my child will miss out on eating what their friends eat       | 4 = Not at all true<br>3 = Somewhat true<br>2 = Mostly true<br>1 = Exactly true                           | 5 - 20        |
| Action self-efficacy          | 5. How confident are you that you can limit the extras you provide to your child from within the home over the next month?<br>I am...                                                                                                                                                                                                             | 1 = Not at all confident<br>2 = Somewhat confident<br>3 = Moderately confident<br>4 = Extremely confident | 1 - 4         |
| Intentions                    | 6. In the next month, I intend to start or continue to limit the extras I provide to my child from within the home.<br>I...                                                                                                                                                                                                                       | 1 = Don't intend at all<br>2 = Somewhat intend<br>3 = Moderately intend<br>4 = Strongly intend            | 1 - 4         |

## Examining constructs of parental reflective motivation towards reducing unhealthy food provision to young children

Brittany J Johnson <sup>1,2\*</sup>, Gilly A Hendrie <sup>3</sup>, Dorota Zarnowiecki <sup>1,4</sup>, Elisabeth K Huynh <sup>5</sup>, Rebecca K Golley <sup>1,4</sup>,

<sup>1</sup> Nutrition & Dietetics, College of Nursing & Health Sciences, Flinders University, Bedford Park 5042, South Australia, Australia;

<sup>2</sup> School of Pharmacy & Medical Sciences, University of South Australia, Adelaide 5000, South Australia, Australia

<sup>3</sup> Health & Biosecurity Flagship, Commonwealth Scientific Industrial Research Organisation, Adelaide 5000, South Australia, Australia

<sup>4</sup> Early Prevention of Obesity in Childhood Centre for Research Excellence, Sydney 2006, New South Wales, Australia

<sup>5</sup> College of Health & Medicine, The Australian National University, Acton 2600, Australian Capital Territory, Australia

\* Correspondence: [brittany.johnson@flinders.edu.au](mailto:brittany.johnson@flinders.edu.au)

**Table S2:** Parental Food Attitude Questionnaire volitional phase

| Motivation construct        | Final question                                                                                                                                                                                                                                                                                                                                                                                                                                                                                           | Scoring criteria                                                                                          | Scoring range |
|-----------------------------|----------------------------------------------------------------------------------------------------------------------------------------------------------------------------------------------------------------------------------------------------------------------------------------------------------------------------------------------------------------------------------------------------------------------------------------------------------------------------------------------------------|-----------------------------------------------------------------------------------------------------------|---------------|
| Maintenance self-efficacy 1 | 7. Some situations can make it hard to maintain certain behaviours. How confident are you, that you could limit providing extras to your child from within the home, even if...<br>e) ...your partner is undermining you<br>f) ...you have other financial pressures<br>g) ...it is school/child care holidays<br>h) ...it takes you a long time to make it habit<br>i) ...your child sees food marketing on television<br>j) ...you are having family time (i.e. movie night, baking, celebrations etc) | 1 = Not at all confident<br>2 = Somewhat confident<br>3 = Moderately confident<br>4 = Extremely confident | 6 - 24        |
| Maintenance self-efficacy 2 | a) ...your child is requesting/ demanding/ fussing/ pestering you for extras<br>b) ...your child is resistant to limiting extras                                                                                                                                                                                                                                                                                                                                                                         |                                                                                                           | 2 - 8         |
| Maintenance self-efficacy 3 | c) ...you are tired<br>d) ...you are having a very busy day                                                                                                                                                                                                                                                                                                                                                                                                                                              |                                                                                                           | 2 - 8         |
| Action planning             | 8. Some parents would like to limit the extras they provide. How true are the following statements for you? I already have strategies for how to limit extras...<br>a) ...at home on weekdays<br>b) ...at home on weekend days<br>c) ...when packing lunch for childcare / kindergarten / school<br>d) ...when buying takeaway meals and snacks for eating at home                                                                                                                                       | 1 = Not at all true<br>2 = Somewhat true<br>3 = Mostly true<br>4 = Exactly true                           | 4 - 16        |
| Coping planning 1           | 9. Some parents would like to limit the extras they provide. How true are the following statements for you? I already have strategies for...<br>b) ...how to manage when friends undermine my plans to limit extras<br>c) ...how to manage when relatives (e.g. grandparents) undermine my plans to limit extras                                                                                                                                                                                         | 1 = Not at all true<br>2 = Somewhat true<br>3 = Mostly true<br>4 = Exactly true                           | 2 - 8         |
| Coping planning 2           | a) ...how to deal with certain situations in order to stick to my intentions (e.g. where I know only extras may be available, when I'm in a hurry, school holidays)<br>d) ...how to deal with set-backs when I provide extras outside of my intentions                                                                                                                                                                                                                                                   |                                                                                                           | 2 - 8         |

## Examining constructs of parental reflective motivation towards reducing unhealthy food provision to young children

Brittany J Johnson <sup>1,2\*</sup>, Gilly A Hendrie <sup>3</sup>, Dorota Zarnowiecki <sup>1,4</sup>, Elisabeth K Huynh <sup>5</sup>, Rebecca K Golley <sup>1,4</sup>,

<sup>1</sup> Nutrition & Dietetics, College of Nursing & Health Sciences, Flinders University, Bedford Park 5042, South Australia, Australia;

<sup>2</sup> School of Pharmacy & Medical Sciences, University of South Australia, Adelaide 5000, South Australia, Australia

<sup>3</sup> Health & Biosecurity Flagship, Commonwealth Scientific Industrial Research Organisation, Adelaide 5000, South Australia, Australia

<sup>4</sup> Early Prevention of Obesity in Childhood Centre for Research Excellence, Sydney 2006, New South Wales, Australia

<sup>5</sup> College of Health & Medicine, The Australian National University, Acton 2600, Australian Capital Territory, Australia

\* Correspondence: [brittany.johnson@flinders.edu.au](mailto:brittany.johnson@flinders.edu.au)

**Table S2:** Parental Food Attitude Questionnaire volitional phase (continued)

| Motivation construct   | Final question                                                                                                                                                                                                              | Scoring criteria         | Scoring range |
|------------------------|-----------------------------------------------------------------------------------------------------------------------------------------------------------------------------------------------------------------------------|--------------------------|---------------|
| Recovery self-efficacy | 10. Sometimes we don't always stick to our intentions. Imagine you have increased the extras you provide to your child for some time. How confident are you about re-limiting the extras you provide to your child after... | 1 = Not at all confident | 3 - 12        |
|                        | a) ...2 days (e.g. after a special occasion)                                                                                                                                                                                | 2 = Somewhat confident   |               |
|                        | b) ...2 to 6 weeks (e.g. after school holidays, Christmas period etc)                                                                                                                                                       | 3 = Moderately confident |               |
|                        | c) ...weeks to months (e.g. after a period of change in family routine)                                                                                                                                                     | 4 = Extremely confident  |               |

## Examining constructs of parental reflective motivation towards reducing unhealthy food provision to young children

Brittany J Johnson<sup>1,2\*</sup>, Gilly A Hendrie<sup>3</sup>, Dorota Zarnowiecki<sup>1,4</sup>, Elisabeth K Huynh<sup>5</sup>, Rebecca K Golley<sup>1,4</sup>

<sup>1</sup> Nutrition & Dietetics, College of Nursing & Health Sciences, Flinders University, Bedford Park 5042, South Australia, Australia;

<sup>2</sup> School of Pharmacy & Medical Sciences, University of South Australia, Adelaide 5000, South Australia, Australia

<sup>3</sup> Health & Biosecurity Flagship, Commonwealth Scientific Industrial Research Organisation, Adelaide 5000, South Australia, Australia

<sup>4</sup> Early Prevention of Obesity in Childhood Centre for Research Excellence, Sydney 2006, New South Wales, Australia

<sup>5</sup> College of Health & Medicine, The Australian National University, Acton 2600, Australian Capital Territory, Australia

\* Correspondence: [brittany.johnson@flinders.edu.au](mailto:brittany.johnson@flinders.edu.au)

### Supplementary File S1: Results from structural equation modelling sensitivity analysis

Sensitivity analysis of the HAPA-based structural equation model was performed on a sub-sample (n=339) excluding all respondents with any missing data (n=156). Model fit statistics ( $X^2=160.233$ ,  $df=83$ ,  $p<0.001$ ; CFI=0.962; TLI=0.945; RMSEA=0.052, PCLOSE=0.355; SRMR=0.0606) supported appropriateness of the HAPA model. The model accounted for 11.0% of the variance in children's servings of unhealthy foods, with primarily similar regression coefficients. The largest paths were as per the primary analysis structural equation model, specifically *Maintenance self-efficacy to Planning* ( $\beta=.858$ ,  $b=.723$ ,  $p<0.001$ ), and between constructs of self-efficacy (action self-efficacy to maintenance self-efficacy  $\beta=.719$ ,  $b=.669$ ,  $p<0.001$ ; maintenance self-efficacy to recovery self-efficacy  $\beta=.728$ ,  $b=.803$ ,  $p<0.001$ ).
